# Supplementary material
Source: Springer Nature journal article supplement (https://www.springermedizin.de/resource/supplementary/12885_2008_1635_MOESM2_ESM.pdf/9472518)
Supplement: MOESM2 [file 9472518]

## Grohmann *et al.* Additional file 2

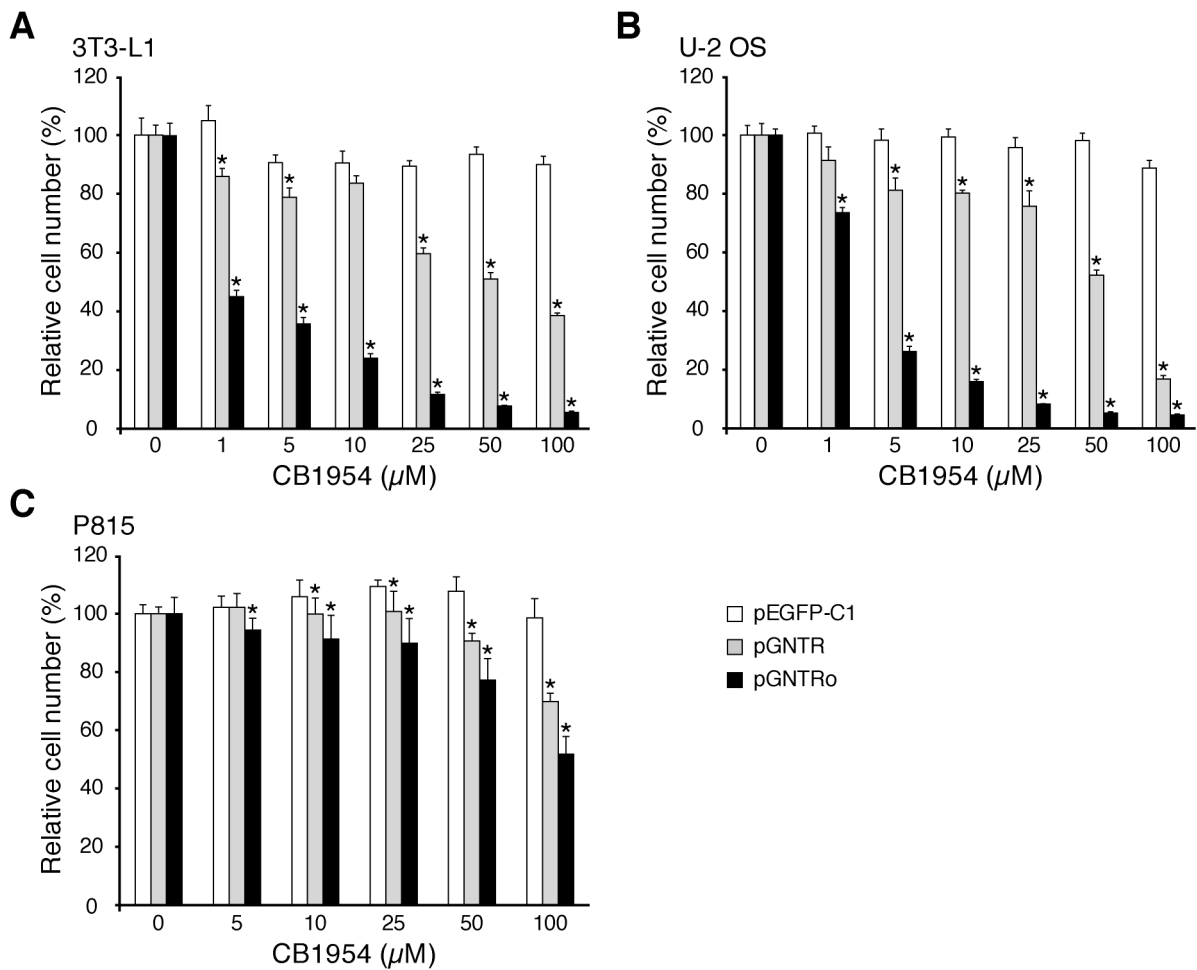

**Additional File 2 - Codon optimization increases the sensitivity of stable human cell lines to the prodrug CB1954.** (A) 3T3-L1, (B) U-2 OS and (C) P815 cells stably transfected with pGNTR, pGNTRo or pEGFP-C1 (control). MTT assays were performed to determine relative cell viability after 48 hours of cultivation in presence of different CB1954 concentrations. (A, B, C) One representative experiment out of two is shown. \*:  $p < 0.05$ ;  $n = 4$ .
